# Supplementary material for: PKC Regulates YAP Expression through Alternative Splicing of YAP 3′UTR Pre-mRNA by hnRNP F
Source: MDPI journal article supplement (doi:10.3390/ijms22020694), 2021-01-12
Supplement: s1 [file s1]

CLUSTAL O(1.2.4) multiple sequence alignment

|         |                                                               |     |
|---------|---------------------------------------------------------------|-----|
| G-tract | -----                                                         | 0   |
| YAP     | AGCCCTCAGGCAGACTGAATTCTAAATCTGTGAAGGATCTAAGGAGACACATGCACCGGA  | 60  |
| TAZ     | -----                                                         | 0   |
| MST1    | -----                                                         | 0   |
| LATS1   | -----                                                         | 0   |
| LATS2   | -----atgggggccaggcacccccaccactcgc                             | 28  |
|         |                                                               |     |
| G-tract | -----                                                         | 0   |
| YAP     | AATTTCCATAAGCCAGTTGCAGTTTTTCAGGCTAATACAGAAAAAGATGAACAAACGTCCA | 120 |
| TAZ     | -----                                                         | 0   |
| MST1    | -----                                                         | 0   |
| LATS1   | -----                                                         | 0   |
| LATS2   | tgctcccagggtcagggtcccg----gagccggtgccctcacaggccaa---tagggaa   | 80  |
|         |                                                               |     |
| G-tract | -----                                                         | 0   |
| YAP     | GCAAGATACTTTAATCCTCTATTTTGCTCTTCCTTGCCATTGCTGCTGTTAATGTATTG   | 180 |
| TAZ     | -----                                                         | 0   |
| MST1    | -----                                                         | 0   |
| LATS1   | -----                                                         | 0   |
| LATS2   | gccgagggtgt----tttgttttaattagtcgctcgattacttcacttgaaattctg     | 135 |
|         |                                                               |     |
| G-tract | -----                                                         | 0   |
| YAP     | CTGACCTCTTTCACAGTTGGCTCTAAAGAATCAAAAGAAAAAACTTTTTATTTCTTTTG   | 240 |
| TAZ     | -----                                                         | 0   |
| MST1    | -----                                                         | 0   |
| LATS1   | -----tat                                                      | 3   |
| LATS2   | ctcttcaccaagaaaacccaacaggacacttttgaaaacaggactcagcatcgct--t-   | 192 |
|         |                                                               |     |
| G-tract | -----                                                         | 0   |
| YAP     | CTATTAATACTACTGTTTCATTTTGGGGGCTGGGGGAAGTGAGCCTGTTTGGATGATGGAT | 300 |
| TAZ     | -----                                                         | 0   |
| MST1    | -----                                                         | 0   |
| LATS1   | atgtttaacacactagtaa-----                                      | 22  |
| LATS2   | ----tcaataggcttttcaggaccttcactgcattaaaacaatatTTTTgaaaatttagt  | 248 |
|         |                                                               |     |
| G-tract | -----                                                         | 0   |
| YAP     | GCCATTCCTTTTGCCAGTTAAATGT----TCACCAATCATTTTAACTAAATACTCAGAC   | 356 |
| TAZ     | -----                                                         | 0   |
| MST1    | -----                                                         | 0   |
| LATS1   | -----                                                         | 22  |
| LATS2   | acagtttagaaagagcacttatTTTgtttatatccatttttcttactaaattataggga   | 308 |
|         |                                                               |     |
| G-tract | -----                                                         | 0   |
| YAP     | TTAGAAGTCAGATGCTTCATGTACAGCATTTAGTTTGTTCAACAGTTGTTCTTCAGCT    | 416 |
| TAZ     | -----                                                         | 0   |
| MST1    | -----                                                         | 0   |
| LATS1   | -----                                                         | 22  |
| LATS2   | ttaactttg--a---caaatcatgctgctgttatTTTctacatttgatTTtatccatag   | 363 |
|         |                                                               |     |
| G-tract | -----                                                         | 0   |
| YAP     | TCCTTTGTCCAGTGGAACCATGATTTACTGGTCTGACAAGCCAAAAATGTTATATCTG    | 476 |
| TAZ     | -----                                                         | 0   |
| MST1    | -----                                                         | 0   |
| LATS1   | -----                                                         | 22  |
| LATS2   | cactt-----attcacatttaggaaaagacataaaaaactgaagaac               | 404 |
|         |                                                               |     |
| G-tract | -----                                                         | 0   |

|       |                                                              |     |
|-------|--------------------------------------------------------------|-----|
| YAP   | ATATT---AAATACTTAATGCTGATTTGAAGAGATAGCTGAAACCAAGGCTGAAGACTGT | 533 |
| TAZ   | -----                                                        | 0   |
| MST1  | -----                                                        | 0   |
| LATS1 | -----ataaatgtaatgaggatttgtaaaagggcctgaa-----                 | 56  |
| LATS2 | attgatgagaaatctctgtgcaataatgtaaaaaaaaaaaaagataacactctgctcaat | 464 |

|         |                                                             |     |
|---------|-------------------------------------------------------------|-----|
| G-tract | -----                                                       | 0   |
| YAP     | TTTACTTTCAGTATTTTCTTTCCTCCTAGTGCTATCATTAGTCACATAATGACCTTGAT | 593 |
| TAZ     | -----                                                       | 0   |
| MST1    | -----                                                       | 0   |
| LATS1   | -----                                                       | 56  |
| LATS2   | gtca-----cggagaccattttatccacacaatggtttttgt                  | 501 |

|         |                                                              |     |
|---------|--------------------------------------------------------------|-----|
| G-tract | -----                                                        | 0   |
| YAP     | TTTATTTTAGGAGCTTATAAGGCATGAGACAATTTCCATATAAATATATTAATTATTGCC | 653 |
| TAZ     | -----                                                        | 0   |
| MST1    | -----                                                        | 0   |
| LATS1   | -----                                                        | 56  |
| LATS2   | tt-----tttattttttcccatgtttcaaaattgtgatataatgat-----          | 542 |

|         |                                                             |     |
|---------|-------------------------------------------------------------|-----|
| G-tract | -----TTGTGGGTGTGC-----                                      | 12  |
| YAP     | ACATACTCTAATATAGATTTTGGTGGATAATTTTGTGGGTGTGCATTTTGTCTGTTTTG | 713 |
| TAZ     | -----                                                       | 0   |
| MST1    | -----                                                       | 0   |
| LATS1   | -----atg                                                    | 59  |
| LATS2   | -----ataatggt-----aaaagctgctttt                             | 563 |

|         |                                                             |     |
|---------|-------------------------------------------------------------|-----|
| G-tract | -----                                                       | 12  |
| YAP     | TTGGGTTTTTTGTTTTTTTG--TTTTTGGCAGGGTCGGTGGGGGGGTGGTTGGTTGGT  | 771 |
| TAZ     | -----                                                       | 0   |
| MST1    | -----                                                       | 0   |
| LATS1   | cgaggtgtttt-----gaggt                                       | 75  |
| LATS2   | tttggctttttgcatacttagtataataggaagtgtgagc---aaggtgatgatgtggc | 619 |

|         |                                                              |     |
|---------|--------------------------------------------------------------|-----|
| G-tract | -----                                                        | 12  |
| YAP     | TGGTTTTGTCCGAACCTAGGCAAATGACCATATTAGTGAATCTGTTAATAGTTGTAGCTT | 831 |
| TAZ     | -----                                                        | 0   |
| MST1    | -----                                                        | 0   |
| LATS1   | t-----ctgagagtaaaattatgcaaatatgacagagct---atatatgtgtgc---    | 121 |
| LATS2   | tgtgatttccgacgtctgggtgtgt-----ggagagtactgcatg                | 658 |

|         |                                                               |     |
|---------|---------------------------------------------------------------|-----|
| G-tract | -----                                                         | 12  |
| YAP     | GGGATGGTTATTGTAGTTGTTTTGGTAAATCTTCATTTCTGGTTTTTTTACCACCTT     | 891 |
| TAZ     | -----                                                         | 0   |
| MST1    | -----                                                         | 0   |
| LATS1   | -----tctg-----                                                | 125 |
| LATS2   | agcagagtcttct-----tcta-ttataaaattaccatatcttgcc-attcacagcaggtc | 710 |

|         |                                                             |     |
|---------|-------------------------------------------------------------|-----|
| G-tract | -----                                                       | 12  |
| YAP     | ATTTAAATCTCGATTATCTGCTCTCTCTTTTATATACATACACACCCCAAACATAACAT | 951 |
| TAZ     | -----                                                       | 0   |
| MST1    | -----                                                       | 0   |
| LATS1   | -----                                                       | 125 |
| LATS2   | ctgtgaatacgtttttac-tgagtgtctt----taaagaggtgttctagacagtgtgc  | 764 |

|         |                                                              |      |
|---------|--------------------------------------------------------------|------|
| G-tract | -----                                                        | 12   |
| YAP     | TTATAATAGTGTGGTAGTGAATGTATCCTTTTTAGGTTTCCTGCTTCCAGTTAATT     | 1011 |
| TAZ     | -----                                                        | 0    |
| MST1    | -----                                                        | 0    |
| LATS1   | -----                                                        | 125  |
| LATS2   | tgat---aatgtattgtgcgggtgacctcttcgctatgattgtatctcttactgttttgt | 821  |

|         |                                                               |      |
|---------|---------------------------------------------------------------|------|
| G-tract | -----                                                         | 12   |
| YAP     | TTTAAATGGTAGCGCTTTGTATGCATTTAGAATACATGACTAGTAGTTTATATTTCACT   | 1071 |
| TAZ     | -----                                                         | 0    |
| MST1    | -----                                                         | 0    |
| LATS1   | -----                                                         | 125  |
| LATS2   | taaagaaatgcag--atgt-----gtaactgagaagtgatttgtgtgtgtgt          | 866  |
| G-tract | -----                                                         | 12   |
| YAP     | GGTAGTT-----TAAATCTG---GTTGGGGCAGTCTGCAGATGTTTGAAGTAGTTTAGT   | 1122 |
| TAZ     | -----                                                         | 0    |
| MST1    | -----                                                         | 0    |
| LATS1   | -----                                                         | 125  |
| LATS2   | cttggttgtgattggattccttggggggggggaactgaaacatttgtcatatactgaact  | 926  |
| G-tract | -----                                                         | 12   |
| YAP     | GTTCTAGA--AAGAGCTATTACTGTGGATAGTGCCTAGGGGAGTGCTCCA-----CG     | 1172 |
| TAZ     | -----                                                         | 0    |
| MST1    | -----gcaaggccagg-----ctgtgagggccccagct                        | 28   |
| LATS1   | -----                                                         | 125  |
| LATS2   | tatatacatcaaagggattaatacacgcga-tgccaaaaagttaatacacggacacatgt  | 985  |
| G-tract | -----                                                         | 12   |
| YAP     | CCCTCTGGGCATACGGTAGATATTATCTGATGAATTGGAAAGGAGCA--AACCAGAA---  | 1227 |
| TAZ     | -----                                                         | 0    |
| MST1    | ccaccaggtcttgggtgaattctggatg--gcttgctcatgtttgttagccagcacct    | 85   |
| LATS1   | -----                                                         | 125  |
| LATS2   | ccgtttctgtagtccgta--tgctctttcattcttggtagagct-gg--tatgtgga---  | 1037 |
| G-tract | -----                                                         | 12   |
| YAP     | ATGGCTTTATTTCTCCCTTGGACTAAT-----TTTTAAGT                      | 1263 |
| TAZ     | -----tactacc-----                                             | 8    |
| MST1    | tctgctctgtcgtctctccacagcacct--t-----tgtgaact                  | 122  |
| LATS1   | -----                                                         | 125  |
| LATS2   | atgccatacctctgaccctactacttacctttttactgacagactgccacactgaaagc   | 1097 |
| G-tract | -----                                                         | 12   |
| YAP     | CTCGATTGGAATTCAGTGAGTAGGTTTCATAATGTGCATGACAGAAATAAGCT--TTATAG | 1321 |
| TAZ     | -----                                                         | 8    |
| MST1    | caggaatgtgcgccagtggaagggtctctcttgaca-----gtcagcgtgccatct      | 173  |
| LATS1   | -----                                                         | 125  |
| LATS2   | ttcagtgaatgttcttagtcctgttttcttctgttactgtcaggaaactgagtgatctaa  | 1157 |
| G-tract | -----                                                         | 12   |
| YAP     | TGGTTTACCTTCATTTAGCTTTGGAAGTTTCTTTGCCTTAGTTTGGGAAGTAAATTCTA   | 1381 |
| TAZ     | -----                                                         | 8    |
| MST1    | tga-----tgtgt-----                                            | 181  |
| LATS1   | -----tgtacaatatatttattttcctaaattatgggaaatcctttta              | 167  |
| LATS2   | tggttctc--tcacttttttttggttcttttagt-----gtactttgaa             | 1199 |
| G-tract | -----                                                         | 12   |
| YAP     | GTTTGTAGTTCTCATTTGTAATGAACACATTAACGACTAGATTAAATATTGCCTTCAAG   | 1441 |
| TAZ     | -----                                                         | 8    |
| MST1    | -----                                                         | 181  |
| LATS1   | a-----                                                        | 168  |
| LATS2   | gtatcaaactctaa-----cttggtttaacaatac-----                      | 1230 |
| G-tract | -----                                                         | 12   |
| YAP     | ATTGTTCTTACTTACAAGACTTGCTCCTACTTCTATGCTGAAAATTGACCCTGGATAGAA  | 1501 |
| TAZ     | -----                                                         | 8    |

|         |                                                              |      |
|---------|--------------------------------------------------------------|------|
| MST1    | -----                                                        | 181  |
| LATS1   | -----                                                        | 168  |
| LATS2   | ----atattcctaacc-tttgtaaaaagcaaagattcttcaaatgacattgaaataaa   | 1285 |
| G-tract | -----                                                        | 12   |
| YAP     | TACTATAAGGTTTTGAGTTAGCTGGAAAAGTGATCAGATTAATAAATGTATATTGGTAGT | 1561 |
| TAZ     | -----                                                        | 8    |
| MST1    | -----                                                        | 181  |
| LATS1   | -----                                                        | 168  |
| LATS2   | aagtaagccatacgt-----atittccttagaagtatagatgtatgtgcgtgta       | 1333 |
| G-tract | -----                                                        | 12   |
| YAP     | TGAATT---TAGCAAAGAAATAGAGATAATCATGATTATACCTTTATTTTTACAGGAAGA | 1618 |
| TAZ     | -----                                                        | 8    |
| MST1    | -----                                                        | 181  |
| LATS1   | -----                                                        | 168  |
| LATS2   | tacacacacacacacacacagagataaacacaatattccttatttcaaattagtatga   | 1393 |
| G-tract | -----                                                        | 12   |
| YAP     | GATGATGTAAGTAGAGTATGTGTCTACAGGAGTAATAATGGTTTCAAAGAGTATTTTTT  | 1678 |
| TAZ     | -----                                                        | 8    |
| MST1    | -----                                                        | 181  |
| LATS1   | -----                                                        | 168  |
| LATS2   | -ttcc--tatttaaag-tgatttatatttgagtaaaaagttcaattcttttttgcttttt | 1449 |
| G-tract | -----                                                        | 12   |
| YAP     | AAAGGAACAAACGAGCATGAATTA-----ACTCTTCAATATAA--GCTATGAAGT-A    | 1728 |
| TAZ     | -----                                                        | 8    |
| MST1    | -----                                                        | 181  |
| LATS1   | -----                                                        | 168  |
| LATS2   | aaaaaatctgatgcttcataattttcattatattattccacatatttttccttgaagtgc | 1509 |
| G-tract | -----                                                        | 12   |
| YAP     | ATAGT-----TGGTTGTGAATTAAAGTGGCACCAGCTAGCACCTCTGTGTTTAAAGGGT  | 1782 |
| TAZ     | -----                                                        | 8    |
| MST1    | -----                                                        | 181  |
| LATS1   | -----                                                        | 168  |
| LATS2   | ttagcataatgtatccattacttagtatatatctaggcaacaacac-----ttagaagt  | 1563 |
| G-tract | -----                                                        | 12   |
| YAP     | CTTTCAATGTTTCTAGAATAAGCCCTTATTTTCAAGGGTTCATAACAGGCATAAAATCTC | 1842 |
| TAZ     | -----                                                        | 8    |
| MST1    | -----                                                        | 181  |
| LATS1   | -----                                                        | 168  |
| LATS2   | ttatcagtggttaactaaaaaataaagattcctgtgta-----ctggtttacatttg    | 1617 |
| G-tract | -----                                                        | 12   |
| YAP     | TTCTCCTGGCAAAAGCTGCTATGAAAAGCCTCAGCTTGGGAAGATAGATTTTTTCCCCC  | 1902 |
| TAZ     | -----                                                        | 8    |
| MST1    | -----                                                        | 181  |
| LATS1   | -----                                                        | 168  |
| LATS2   | tgtgagtggcataactcaagtctgctgtgcctgtcgtcgtga-----              | 1658 |
| G-tract | -----                                                        | 12   |
| YAP     | CAATTACAAAATCTAAGTATTTTGGCCCTTCAATTTGGAGGAGGGCAAAAGTTGGAAGTA | 1962 |
| TAZ     | -----                                                        | 8    |
| MST1    | -----                                                        | 181  |
| LATS1   | -----aatgttaattttattccagccgtttaaat-----                      | 196  |
| LATS2   | -----ctgtcagtatctcgtctatttt---atagtcgtgccat-ggttg-----       | 1697 |

|         |                                                             |      |
|---------|-------------------------------------------------------------|------|
| G-tract | -----                                                       | 12   |
| YAP     | AGAAGTTTTATTTTAAGTACTTTCAGTGCTCAAAAAATGCAATCACTGTGTTGTATATA | 2022 |
| TAZ     | -----                                                       | 8    |
| MST1    | -----gtatgtacattggtca-----                                  | 197  |
| LATS1   | -----cagtatttagaaaaaa                                       | 212  |
| LATS2   | -----ttactcacagcgctct-----gacatactttcatgtg                  | 1729 |

|         |                                                              |      |
|---------|--------------------------------------------------------------|------|
| G-tract | -----                                                        | 12   |
| YAP     | ATAGTTCATAGGTTGATCACTCATAATAATTGACTCTAAGGCTTTTATTAAGAAAACAGC | 2082 |
| TAZ     | -----                                                        | 8    |
| MST1    | -----ggtatattatctcaaag-----                                  | 214  |
| LATS1   | at-----tggtataaggaaagtaaa                                    | 232  |
| LATS2   | gtag-----gttctttctcaggaactcagt                               | 1754 |

|         |                                                              |      |
|---------|--------------------------------------------------------------|------|
| G-tract | -----                                                        | 12   |
| YAP     | AGAAAGATTAAATCTTGAATTAAGTCTGGGGGGAAATGGCCACTGCAGATGGAGTTTTAG | 2142 |
| TAZ     | -----                                                        | 8    |
| MST1    | -----                                                        | 214  |
| LATS1   | ttatgaactg-----                                              | 242  |
| LATS2   | ttaactattatttattgatatatcattacctttgaaaagcttctactggcacaattta-- | 1812 |

|         |                                                              |      |
|---------|--------------------------------------------------------------|------|
| G-tract | -----                                                        | 12   |
| YAP     | AGTAGTAATGAAATTCTACCTAGAATGCAAAATTGGGTATATGAATTACATAGCATGTTG | 2202 |
| TAZ     | -----attgtaacttggatgtagccatgaccttacatttcc                    | 44   |
| MST1    | -----                                                        | 214  |
| LATS1   | -----aatattatagtcagttc                                       | 259  |
| LATS2   | -----                                                        | 1812 |

|         |                                                              |      |
|---------|--------------------------------------------------------------|------|
| G-tract | -----                                                        | 12   |
| YAP     | TTGGGATTTTTTTTAATGTGCAGAAGATCAAAGCTACTTGGAAGGAGTGCCTATAATTTG | 2262 |
| TAZ     | t-----                                                       | 45   |
| MST1    | -----                                                        | 214  |
| LATS1   | ttggtact-----                                                | 267  |
| LATS2   | -----                                                        | 1812 |

|         |                                                              |      |
|---------|--------------------------------------------------------------|------|
| G-tract | -----                                                        | 12   |
| YAP     | CCAGTAGCCACAGATTAAGATTATATCTTATATATCAGCAGATTAGCTTTAGCTTAGGGG | 2322 |
| TAZ     | -----                                                        | 45   |
| MST1    | -----                                                        | 214  |
| LATS1   | -----                                                        | 267  |
| LATS2   | -----                                                        | 1812 |

|         |                                                             |      |
|---------|-------------------------------------------------------------|------|
| G-tract | -----                                                       | 12   |
| YAP     | GAGGGTGGGAAAGTTTGGGGGGGGGTTGTGAAGATTTAGGGGGACCTTGATAGAGAACT | 2382 |
| TAZ     | -----                                                       | 45   |
| MST1    | -----                                                       | 214  |
| LATS1   | -----                                                       | 267  |
| LATS2   | -----                                                       | 1812 |

|         |                                                              |      |
|---------|--------------------------------------------------------------|------|
| G-tract | -----                                                        | 12   |
| YAP     | TTATAAACTTCTTTCTCTTTAATAAAGACTTGTCTTACACCGTGCTGCCATTAAAGGCAG | 2442 |
| TAZ     | -----                                                        | 45   |
| MST1    | -----                                                        | 214  |
| LATS1   | -----                                                        | 267  |
| LATS2   | -----                                                        | 1812 |

|         |                                                              |      |
|---------|--------------------------------------------------------------|------|
| G-tract | -----                                                        | 12   |
| YAP     | CTGTTCTAGAGTTTCAGTCACCTAAGTACACCCACAAAACAATATGAATATGGAGATCTT | 2502 |
| TAZ     | -----                                                        | 45   |
| MST1    | -----                                                        | 214  |
| LATS1   | -----                                                        | 267  |

|       |       |      |
|-------|-------|------|
| LATS2 | ----- | 1812 |
|-------|-------|------|

|         |                                                             |      |
|---------|-------------------------------------------------------------|------|
| G-tract | -----                                                       | 12   |
| YAP     | CCTTTACCCCTCAACTTTAATTTGCCAGTTATACCTCAGTGTTGTAGCAGTACTGTGAT | 2562 |
| TAZ     | -----                                                       | 45   |
| MST1    | -----gatttatattgggcgacttttaactcagagttttaaacccagg-----       | 258  |
| LATS1   | -----                                                       | 267  |
| LATS2   | -----                                                       | 1812 |

|         |                                                              |      |
|---------|--------------------------------------------------------------|------|
| G-tract | -----                                                        | 12   |
| YAP     | ACCTGGCACAGTGCTTTGATCTTACGATGCCCTCTGTACTGACCTGAAGGAGACCTAAGA | 2622 |
| TAZ     | -----                                                        | 45   |
| MST1    | -----aacagag-----actcctagttgagtgatagctggga                   | 290  |
| LATS1   | -----                                                        | 267  |
| LATS2   | -----                                                        | 1812 |

|         |                                                             |      |
|---------|-------------------------------------------------------------|------|
| G-tract | -----                                                       | 12   |
| YAP     | GTCCTTTCCCTTTTTGAGTTGAATCATAGCCTTGATGTGGTCTCTTGTTTTATGTCCTT | 2682 |
| TAZ     | -----                                                       | 45   |
| MST1    | aagttttacattgt-----ctg-----t                                | 308  |
| LATS1   | -----                                                       | 267  |
| LATS2   | -----                                                       | 1812 |

|         |                                                           |      |
|---------|-----------------------------------------------------------|------|
| G-tract | -----                                                     | 12   |
| YAP     | GTTCTAATGTAAAAGTGCTTAAGTCTTCTTGTTGTATTGGGTAGCATTGGGATAAGA | 2742 |
| TAZ     | -----                                                     | 45   |
| MST1    | ttttcttc-----tcccaatagc                                   | 326  |
| LATS1   | -----                                                     | 267  |
| LATS2   | -----                                                     | 1812 |

|         |                                                             |      |
|---------|-------------------------------------------------------------|------|
| G-tract | -----                                                       | 12   |
| YAP     | TTTAACTGGGTATTCTTGAATTGCTTTTACAATAAACCAATTTTATAATCTTTAAATTT | 2802 |
| TAZ     | -----                                                       | 45   |
| MST1    | tttcaattgttctttctggaagacttttaaaaaaatataaatatgcatat-----atat | 380  |
| LATS1   | -----                                                       | 267  |
| LATS2   | -----                                                       | 1812 |

|         |                                                              |      |
|---------|--------------------------------------------------------------|------|
| G-tract | -----                                                        | 12   |
| YAP     | ATCAACTTTTTACATTTGTGTTATTTTCAGTCAGGGCTTCTTAGATCTACTTATGGTTGA | 2862 |
| TAZ     | -----gggcctcttggaag-----tga                                  | 65   |
| MST1    | atataaat-----                                                | 388  |
| LATS1   | -----                                                        | 267  |
| LATS2   | -----                                                        | 1812 |

|         |                                                              |      |
|---------|--------------------------------------------------------------|------|
| G-tract | -----                                                        | 12   |
| YAP     | TGGAGCACATTGATTTGGAGTTTCAGATCTTCAAAGCACTATTTGTTGTAATAACTTTT  | 2922 |
| TAZ     | tggagcagagcaagtctgcagggtgcaccacttcccgctccatgactcgtgctccctcct | 125  |
| MST1    | -----                                                        | 388  |
| LATS1   | -----                                                        | 267  |
| LATS2   | -----                                                        | 1812 |

|         |                                                              |      |
|---------|--------------------------------------------------------------|------|
| G-tract | -----                                                        | 12   |
| YAP     | CTAAATGTAGTGCCTTTAAAGGAAAAATGAA-----CACAGGGAAGTGACTTTGCTAC   | 2975 |
| TAZ     | ttttatgttgccagtttaatcattgcctggttttgattgagagtaacttaagttaaacad | 185  |
| MST1    | -----tataaatagattcccca-----cgcaggttggtggcatctctgt            | 427  |
| LATS1   | -----                                                        | 267  |
| LATS2   | -----                                                        | 1812 |

|         |                                                              |      |
|---------|--------------------------------------------------------------|------|
| G-tract | -----                                                        | 12   |
| YAP     | AAATAATGTTGCTGTGTTAAGTATTCATATTAAATACATGCCTTCTATATGGAACATGGC | 3035 |

|       |                                                 |      |
|-------|-------------------------------------------------|------|
| TAZ   | aaataaatattctatttttcattttcaaaaaaaaaaaaaa-----aa | 225  |
| MST1  | -----                                           | 427  |
| LATS1 | -----                                           | 267  |
| LATS2 | -----                                           | 1812 |

|         |                                                              |      |
|---------|--------------------------------------------------------------|------|
| G-tract | -----                                                        | 12   |
| YAP     | AGAAAGACTGAAAAATAACAGTAATTAATTGTGTAATTCAGAATTCATACCAATCAGTGT | 3095 |
| TAZ     | aaaaaaaaaaaaaaaaaaaaaaaaaaaaa--aaaa-----a-----aaaaaaa-----   | 268  |
| MST1    | -----                                                        | 427  |
| LATS1   | -----                                                        | 267  |
| LATS2   | -----                                                        | 1812 |

|         |                                                              |      |
|---------|--------------------------------------------------------------|------|
| G-tract | -----                                                        | 12   |
| YAP     | TGAAACTCAAACATTGCAAAAGTGGGTGGCAATATTCAGTGCTTAACACTTTTCTAGCGT | 3155 |
| TAZ     | --aaaaaaaaaaaaaaaaaaaaa-----                                 | 287  |
| MST1    | -----                                                        | 427  |
| LATS1   | -----taaagtacttaaaataagtagtgctt                              | 293  |
| LATS2   | -----                                                        | 1812 |

|         |                                                              |      |
|---------|--------------------------------------------------------------|------|
| G-tract | -----                                                        | 12   |
| YAP     | TGGTACATCTGAGAAATGAGTGCTCAGGTGGATTTTATCCTCGCAAGCATGTTGTTATAA | 3215 |
| TAZ     | -----                                                        | 287  |
| MST1    | -----                                                        | 427  |
| LATS1   | tgtttaaaaggagaaacctggtatctatttgtatatatgcta-----              | 335  |
| LATS2   | -----                                                        | 1812 |

|         |                                                              |      |
|---------|--------------------------------------------------------------|------|
| G-tract | -----                                                        | 12   |
| YAP     | GAATTGTGGGTGTGCCTATCATAACAATTGTTTTCTGTATCTTGAAAAAGTATTCTCCAC | 3275 |
| TAZ     | -----                                                        | 287  |
| MST1    | -----                                                        | 427  |
| LATS1   | -----                                                        | 335  |
| LATS2   | -----                                                        | 1812 |

|         |                                                              |      |
|---------|--------------------------------------------------------------|------|
| G-tract | -----                                                        | 12   |
| YAP     | ATTTTAAATGTTTTATATTAGAGAATTCITTAATGCACACTTGTCAAATATATATATATA | 3335 |
| TAZ     | -----                                                        | 287  |
| MST1    | -----                                                        | 427  |
| LATS1   | -----aataatttttaaaataacaagagt-----                           | 357  |
| LATS2   | -----                                                        | 1812 |

|         |                                                             |      |
|---------|-------------------------------------------------------------|------|
| G-tract | -----                                                       | 12   |
| YAP     | GTACCAATGTTACCTTTTTATTTTTGTTTTAGATGTAAGAGCATGCTCATATGTTAGGT | 3395 |
| TAZ     | -----                                                       | 287  |
| MST1    | -----                                                       | 427  |
| LATS1   | -----ttttgaaatttttttctaga-----                              | 377  |
| LATS2   | -----                                                       | 1812 |

|         |                                                           |      |
|---------|-----------------------------------------------------------|------|
| G-tract | -----                                                     | 12   |
| YAP     | ACTTACATAAATTGTTACATTATTTTTCTTATGTAATACCTTTTTGTTTGTATGTGG | 3455 |
| TAZ     | -----                                                     | 287  |
| MST1    | -----                                                     | 427  |
| LATS1   | -----                                                     | 377  |
| LATS2   | -----                                                     | 1812 |

|         |                                       |      |
|---------|---------------------------------------|------|
| G-tract | -----                                 | 12   |
| YAP     | TTCAAATATATTCTTTCCTTAAACTCTTAAAAAAAAA | 3493 |
| TAZ     | -----                                 | 287  |
| MST1    | -----                                 | 427  |
| LATS1   | -----                                 | 377  |
| LATS2   | -----ttattaaaattttgaatccaaa-          | 1834 |
